# Supplementary material for: RETRACTED: Study on the Removal Efficiency and Mechanism of Tetracycline in Water Using Biochar and Magnetic Biochar
Source: MDPI journal article supplement (doi:10.3390/coatings11111354), 2021-11-03
Supplement: s1 [file s1]

# Supplementary Materials: Study on the Removal Efficiency and Mechanism of Tetracycline in Water Using Biochar and Magnetic Biochar

Hongwei Sun <sup>1,\*</sup>, Jingjie Yang <sup>1</sup>, Yue Wang <sup>1</sup>, Yucan Liu <sup>2,\*</sup>, Chenjian Cai <sup>3</sup> and Afshin Davarpanah <sup>4</sup>

<sup>1</sup> College of Environmental and Material Engineering, Yantai University, Yantai Shandong 264005, China; yangjingjieyt@163.com (J.Y.), and wangstyue@126.com (Y.W.)

<sup>2</sup> College of Civil Engineering, Yantai University, Yantai Shandong 264005, China

<sup>3</sup> College of Environmental and Municipal Engineering, Lanzhou Jiaotong University, Lanzhou 730070, China; caichenjianlzt@126.com

<sup>4</sup> Department of Petroleum Engineering, Science and Research Branch, Islamic Azad University, Tehran 1477893855, Iran; afshindpe@gmail.com

\* Correspondence: sunhongweiytu@163.com (H.S.); liuyucanytu@163.com (Y.L.)

**Citation:** Sun, H.; Yang, J.; Wang, Y.; Liu, Y.; Cai, C.; Davarpanah, A. Study on the Removal Efficiency and Mechanism of Tetracycline in Water Using Biochar and Magnetic Biochar. *Coatings* **2021**, *11*, 1354. <https://doi.org/10.3390/coatings11111354>

Academic Editors: Awais Ahmad and Artur P. Terzyk

Received: 3 October 2021

Accepted: 1 November 2021

Published: date

**Publisher's Note:** MDPI stays neutral with regard to jurisdictional claims in published maps and institutional affiliations.

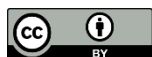

**Copyright:** © 2021 by the authors. Submitted for possible open access publication under the terms and conditions of the Creative Commons Attribution (CC BY) license (<http://creativecommons.org/licenses/by/4.0/>).

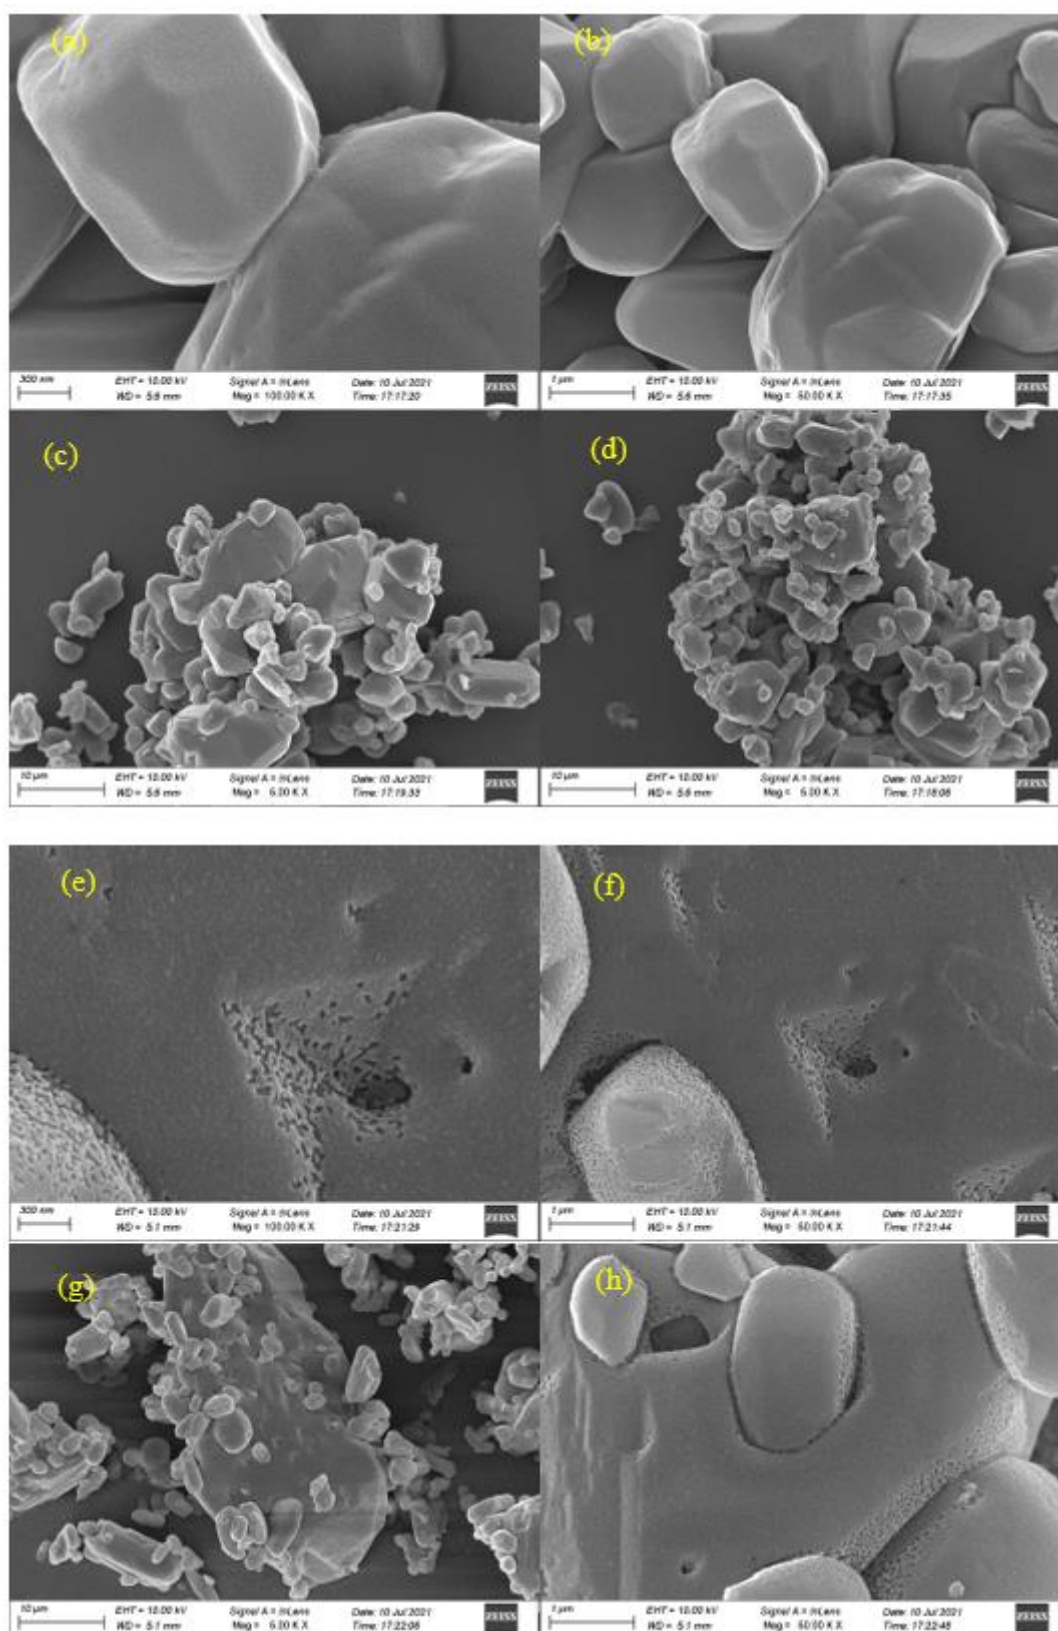

**Figure S1.** Tebuconazole and linuron particle morphologies. (a) Tebuconazole with magnitude of 100.00 K.X; (b) Tebuconazole with magnitude of 50.00 K.X; (c) Tebuconazole with XRD magnitude of 5.00 K.X; (d) Tebuconazole with XRD magnitude of 50.00 K.X; (e) linuron with magnitude of 100.00 K.X; (f) linuron with magnitude of 50.00 K.X ; (g) linuron with XRD magnitude of 5.00 K.X; (h) linuron with XRD magnitude of 50.00 K.X.

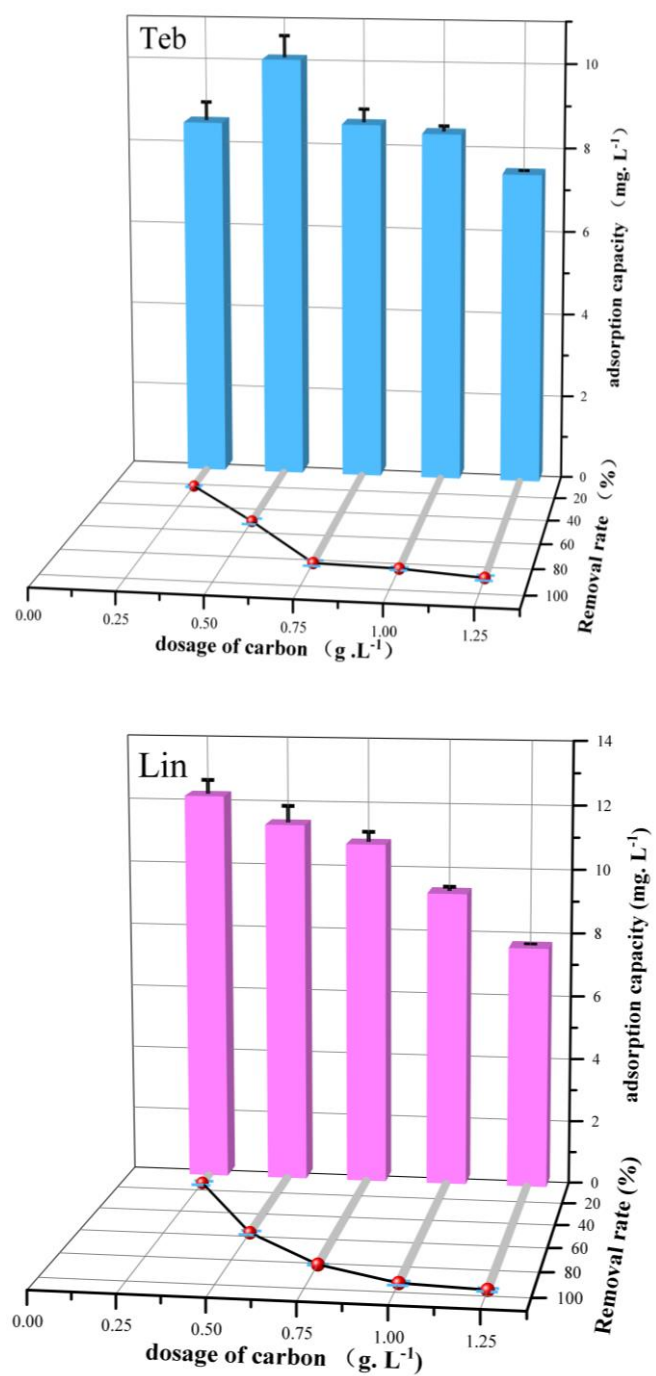

**Figure S2.** The adsorption effect of biochar prepared under different conditions on tebuconazole and linuron.

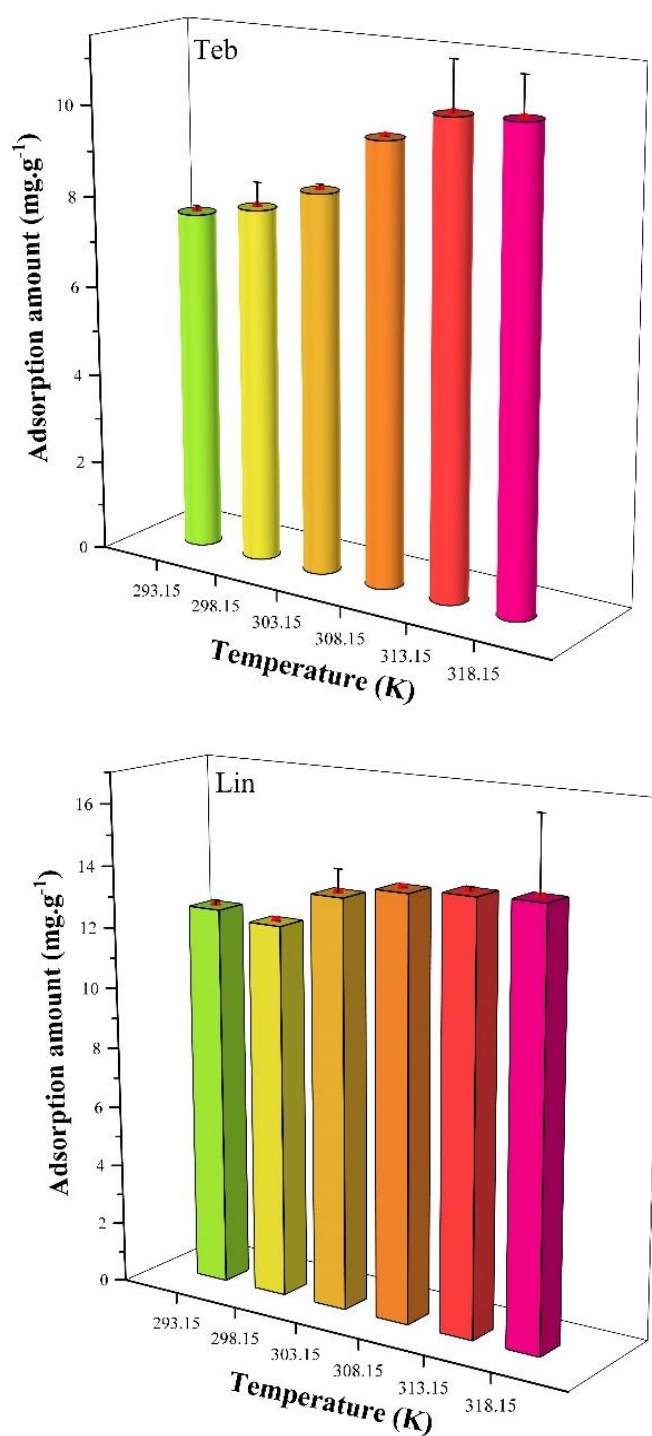

**Figure S3.** Effect of temperature on adsorption of tebuconazole and linuron on BCF600.

**Table S1.** Correlational analysis of BCF600 adsorption capacity and concentration of metal salt ions.

|              |                            | <b>Cu<sup>2+</sup></b> | <b>Cr<sup>6+</sup></b> | <b>Mg<sup>2+</sup></b> | <b>Ca<sup>2+</sup></b> | <b>K<sup>+</sup></b> | <b>Pb<sup>2+</sup></b> |
|--------------|----------------------------|------------------------|------------------------|------------------------|------------------------|----------------------|------------------------|
| Tebuconazole | Pearson correlation (r)    | -0.571                 | -0.793                 | -0.216                 | 0.078                  | -0.028               | 0.700                  |
|              | Significance two sided (P) | 0.053                  | 0.002                  | 0.501                  | 0.809                  | 0.930                | 0.011                  |
|              | N                          | 16                     | 16                     | 16                     | 16                     | 16                   | 16                     |
| Linuron      | Pearson correlation (r)    | -0.011                 | -0.943                 | 0.076                  | 0.586                  | 0.354                | -0.307                 |
|              | Significance two sided (P) | 0.973                  | 0.000                  | 0.813                  | 0.045                  | 0.259                | 0.332                  |
|              | N                          | 16                     | 16                     | 16                     | 16                     | 16                   | 16                     |

**Table S2.** Correlational analysis of BCF600 adsorption capacity and concentration of humic acid and soluble starch.

|              |                            | Humic acid | soluble starch |
|--------------|----------------------------|------------|----------------|
| Tebuconazole | Pearson correlation (r)    | −0.798     | −0.344         |
|              | Significance two sided (P) | 0.002      | 0.274          |
|              | N                          | 16         | 16             |
| Linuron      | Pearson correlation (r)    | −0.947     | −0.627         |
|              | Significance two sided (P) | 0.000      | 0.274          |
|              | N                          | 16         | 0.029          |

**Table S3.** Water quality parameters at different sampling locations.

| Location                | Turbidity | pH   | TOC    | TC     | IC    | uv254 | NH <sub>4</sub> <sup>+</sup> -N |
|-------------------------|-----------|------|--------|--------|-------|-------|---------------------------------|
| Guangdang river         | 11.34     | 7.35 | 11.14  | 33.89  | 22.75 | 0.179 | 7.79                            |
| Fenghuangshan reservoir | 10.22     | 8.27 | 10.86  | 38.87  | 28.01 | 0.146 | 8.87                            |
| Miaohou reservoir       | 5.43      | 8.18 | 13.49  | 53.84  | 40.36 | 0.189 | 15.36                           |
| Tap water               | 0.14      | 7.94 | 1.236  | 34.47  | 34.47 | 0.02  | 0.09                            |
| Deionized water         | 0.06      | 6.85 | 0.3174 | 0.4504 | 0.133 | 0.01  | 0                               |

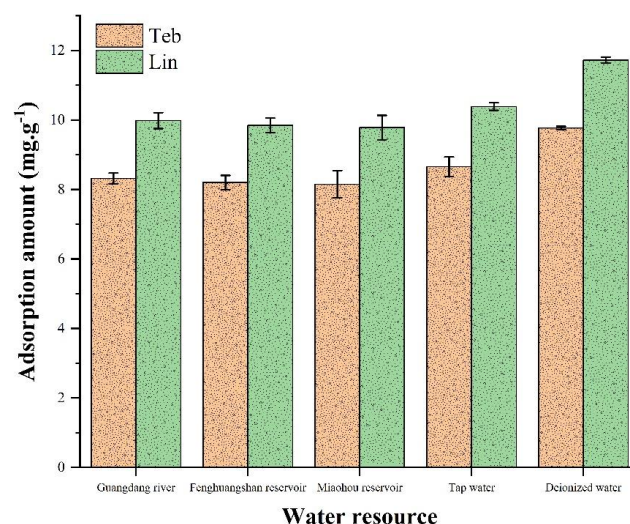**Figure S4.** Tebuconazole and linuron removal efficacy in real water bodies on BCF600.

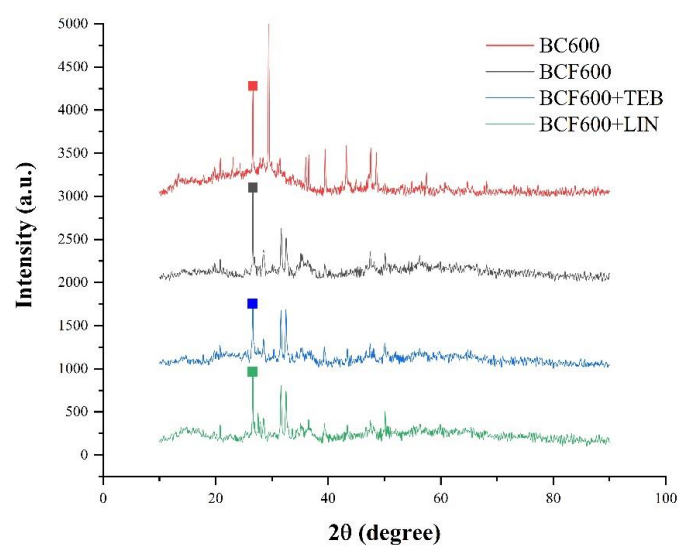

**Figure S5.** XRD analysis of BC600, BCF600 and BCF600 after uptake tebuconazole and linuron.
